# Supplementary material for: Stakeholder-Identified Interventions to Address Cancer Survivors’ Psychosocial Needs after Completing Treatment
Source: MDPI journal article supplement (doi:10.3390/curroncol28060416), 2021-11-25
Supplement: s1 [file s1]

**Document S1.** Consolidated criteria for reporting qualitative studies (COREQ): 32-item checklist

| No                                                     | Item                    | Guide questions/description                                 | Author response                                                                                                                                                          |
|--------------------------------------------------------|-------------------------|-------------------------------------------------------------|--------------------------------------------------------------------------------------------------------------------------------------------------------------------------|
| <b>Domain 1:<br/>Research team<br/>and reflexivity</b> |                         |                                                             |                                                                                                                                                                          |
| Personal<br>Characteristics                            |                         |                                                             |                                                                                                                                                                          |
| 1.                                                     | Interviewer/facilitator | Which author/s conducted the interview or focus group?      | Sarah Murnaghan [SM]; stated in text (methods section)                                                                                                                   |
| 2.                                                     | Credentials             | What were the researcher's credentials? <i>E.g. PhD, MD</i> | SM: RN<br>CK: MSc<br>JS: MD<br>GAP: MD<br>DH: PhD<br>EG: MD, DPhil<br>RU: PhD                                                                                            |
| 3.                                                     | Occupation              | What was their occupation at the time of the study?         | SM: Master's student and nurse<br>CK: PhD student<br>JS: Professor & Oncologist<br>GAP: Professor & Surgeon<br>DH: Professor<br>EG: Professor<br>RU: Associate Professor |
| 4.                                                     | Gender                  | Was the researcher male or female?                          | SM: female<br>CK: female<br>JS: male<br>GAP: male<br>DH: female<br>EG: female<br>RU: female                                                                              |

|                                |                                          |                                                                                                                                                                 |                                                                                                                                                                                                                        |
|--------------------------------|------------------------------------------|-----------------------------------------------------------------------------------------------------------------------------------------------------------------|------------------------------------------------------------------------------------------------------------------------------------------------------------------------------------------------------------------------|
| 5.                             | Experience and training                  | What experience or training did the researcher have?                                                                                                            | SM: training from RU in qualitative research<br>RU: PI, expertise in qualitative research                                                                                                                              |
| Relationship with participants |                                          |                                                                                                                                                                 |                                                                                                                                                                                                                        |
| 6.                             | Relationship established                 | Was a relationship established prior to study commencement?                                                                                                     | There was no relationship between the interviewer [SM] and either participant prior to study commencement. The senior author [RU] knew some study participants (healthcare providers) in a professional capacity only. |
| 7.                             | Participant knowledge of the interviewer | What did the participants know about the researcher? e.g. <i>personal goals, reasons for doing the research</i>                                                 | Many participants (healthcare providers) would have known that the senior author [RU] has a research program in cancer survivorship.                                                                                   |
| 8.                             | Interviewer characteristics              | What characteristics were reported about the interviewer/facilitator? e.g. <i>Bias, assumptions, reasons and interests in the research topic</i>                | No characteristics are reported about the interviewer. She was a Master's student, supervised by the corresponding author [RU].                                                                                        |
| <b>Domain 2: study design</b>  |                                          |                                                                                                                                                                 |                                                                                                                                                                                                                        |
| Theoretical framework          |                                          |                                                                                                                                                                 |                                                                                                                                                                                                                        |
| 9.                             | Methodological orientation and Theory    | What methodological orientation was stated to underpin the study? e.g. <i>grounded theory, discourse analysis, ethnography, phenomenology, content analysis</i> | This was a descriptive qualitative study, with the guiding orientation cited in the paper (Sandelowski); stated in text (methods section)                                                                              |
| Participant selection          |                                          |                                                                                                                                                                 |                                                                                                                                                                                                                        |

|                 |                              |                                                                                           |                                                                                                                                                            |
|-----------------|------------------------------|-------------------------------------------------------------------------------------------|------------------------------------------------------------------------------------------------------------------------------------------------------------|
| 10.             | Sampling                     | How were participants selected? <i>e.g. purposive, convenience, consecutive, snowball</i> | Self-selected by posters and study information (patients/caregivers) or purposive (healthcare providers); stated in text (methods section)                 |
| 11.             | Method of approach           | How were participants approached? <i>e.g. face-to-face, telephone, mail, email</i>        | Email and self-selection; stated in text (methods section)                                                                                                 |
| 12.             | Sample size                  | How many participants were in the study?                                                  | 44 (healthcare providers/decision-makers = 26; cancer survivors/caregivers = 18); stated in text (results section)                                         |
| 13.             | Non-participation            | How many people refused to participate or dropped out? Reasons?                           | As patients and caregivers were self-selected none refused or dropped out; 26/34 healthcare providers/decision-makers contacted participated in the study. |
| Setting         |                              |                                                                                           |                                                                                                                                                            |
| 14.             | Setting of data collection   | Where was the data collected? <i>e.g. home, clinic, workplace</i>                         | Telephone; stated in text (methods section).                                                                                                               |
| 15.             | Presence of non-participants | Was anyone else present besides the participants and researchers?                         | No.                                                                                                                                                        |
| 16.             | Description of sample        | What are the important characteristics of the sample? <i>e.g. demographic data, date</i>  | Demographic data reported include region of residence, cancer type, and age.                                                                               |
| Data collection |                              |                                                                                           |                                                                                                                                                            |
| 17.             | Interview guide              | Were questions, prompts, guides provided by the authors? Was it pilot tested?             | There was an interview guide developed by the researchers (provided in Supplemental File 1), based on the research objectives and relevant literature.     |
| 18.             | Repeat interviews            | Were repeat interviews carried out? If yes, how many?                                     | No; stated in text (methods section).                                                                                                                      |

|                                            |                                |                                                                          |                                                                                                                                                                                                                                                 |
|--------------------------------------------|--------------------------------|--------------------------------------------------------------------------|-------------------------------------------------------------------------------------------------------------------------------------------------------------------------------------------------------------------------------------------------|
| 19.                                        | Audio/visual recording         | Did the research use audio or visual recording to collect the data?      | Yes, audio recording; stated in text (methods section).                                                                                                                                                                                         |
| 20.                                        | Field notes                    | Were field notes made during and/or after the interview or focus group?  | No.                                                                                                                                                                                                                                             |
| 21.                                        | Duration                       | What was the duration of the interviews or focus group?                  | ~15-54 minutes.                                                                                                                                                                                                                                 |
| 22.                                        | Data saturation                | Was data saturation discussed?                                           | Yes, the interviews continued until data saturation was reached. This was determined by constant comparison techniques and research team discussion.                                                                                            |
| 23.                                        | Transcripts returned           | Were transcripts returned to participants for comment and/or correction? | No.                                                                                                                                                                                                                                             |
| <b>Domain 3:<br/>analysis and findings</b> |                                |                                                                          |                                                                                                                                                                                                                                                 |
| Data analysis                              |                                |                                                                          |                                                                                                                                                                                                                                                 |
| 24.                                        | Number of data coders          | How many data coders coded the data?                                     | Two researchers [SM, RU] independently coded the first 3 transcripts. SM then coded all of the remaining transcripts, with RU reviewing all coding (methods section).                                                                           |
| 25.                                        | Description of the coding tree | Did authors provide a description of the coding tree?                    | A coding scheme, containing code definitions and decision rules related to each code, was developed by RU and SM. This was achieved after independently coding the first 3 transcripts, with codes added or merged as needed (methods section). |
| 26.                                        | Derivation of themes           | Were themes identified in advance or derived                             | Themes were derived from the data                                                                                                                                                                                                               |

|           |                              |                                                                                                                                          |                                               |
|-----------|------------------------------|------------------------------------------------------------------------------------------------------------------------------------------|-----------------------------------------------|
|           |                              | from the data?                                                                                                                           | (methods section).                            |
| 27.       | Software                     | What software, if applicable, was used to manage the data?                                                                               | Yes, NVivo; stated in text (methods section). |
| 28.       | Participant checking         | Did participants provide feedback on the findings?                                                                                       | No.                                           |
| Reporting |                              |                                                                                                                                          |                                               |
| 29.       | Quotations presented         | Were participant quotations presented to illustrate the themes / findings? Was each quotation identified? e.g. <i>participant number</i> | Yes (results section).                        |
| 30.       | Data and findings consistent | Was there consistency between the data presented and the findings?                                                                       | Yes.                                          |
| 31.       | Clarity of major themes      | Were major themes clearly presented in the findings?                                                                                     | Yes.                                          |
| 32.       | Clarity of minor themes      | Is there a description of diverse cases or discussion of minor themes?                                                                   | No.                                           |
